# Supplementary material for: Structure determination and bonding properties of gas-phase OPt2− anion and its neutral form
Source: Royal Society of Chemistry journal article supplement (doi:10.1039/d2cp03977j), 2022-01-01
Supplement: d2cp03977j1.pdf [file d2cp03977j1.pdf]

# **Structural determination and bonding properties of gas-phase $\text{OPt}_2^-$ anion and its neutral**

Sheng-Jie Lu<sup>1\*</sup>

<sup>1</sup>*College of Chemistry and Chemical Engineering, Heze University, Heze, Shandong Province, 274015, China*

\* Corresponding author. E-mail: [lushengjie@iccas.ac.cn](mailto:lushengjie@iccas.ac.cn)

**Table S1.** Cartesian coordinates of the low-lying isomers of  $\text{OPt}_2^{-/0}$ .

| A  |             |             | B          |    |             |             |            |
|----|-------------|-------------|------------|----|-------------|-------------|------------|
|    | X           | Y           | Z          |    | X           | Y           | Z          |
| Pt | -0.09917500 | -1.28855500 | 0.00000000 | Pt | 0.00000000  | -0.00000000 | -          |
|    |             |             |            |    |             |             | 1.32713118 |
| Pt | 0.00000000  | 1.03309300  | 0.00000000 | Pt | 0.00000000  | 0.00000000  | 1.03898355 |
| O  | 0.96695900  | 2.49075900  | 0.00000000 | O  | 0.00000000  | -0.00000000 | 2.80943946 |
| C  |             |             |            |    |             |             |            |
|    | X           | Y           | Z          |    | X           | Y           | Z          |
| Pt | -1.29749100 | 0.06686500  | 0.00000000 |    |             |             |            |
| Pt | 1.29749100  | 0.06602800  | 0.00000000 |    |             |             |            |
| O  | 0.00000000  | -1.29570900 | 0.00000000 |    |             |             |            |
| A' |             |             | B'         |    |             |             |            |
|    | X           | Y           | Z          |    | X           | Y           | Z          |
| Pt | -0.13820700 | -1.22198200 | 0.00000000 | Pt | -0.09472600 | -1.25419300 | 0.00000000 |
| Pt | 0.00000000  | 1.22977100  | 0.00000000 | Pt | 0.00000000  | 1.00488200  | 0.00000000 |
| O  | 1.34752000  | -0.07594200 | 0.00000000 | O  | 0.92358100  | 2.43078000  | 0.00000000 |
| C' |             |             |            |    |             |             |            |
|    | X           | Y           | Z          |    | X           | Y           | Z          |
| Pt | 0.00000000  | -1.55192737 | -          |    |             |             |            |
|    |             |             | 0.04425118 |    |             |             |            |
| Pt | -0.00000000 | 1.55192737  | -          |    |             |             |            |
|    |             |             | 0.04425118 |    |             |             |            |
| O  | 0.00000000  | 0.00000000  | 0.86294776 |    |             |             |            |

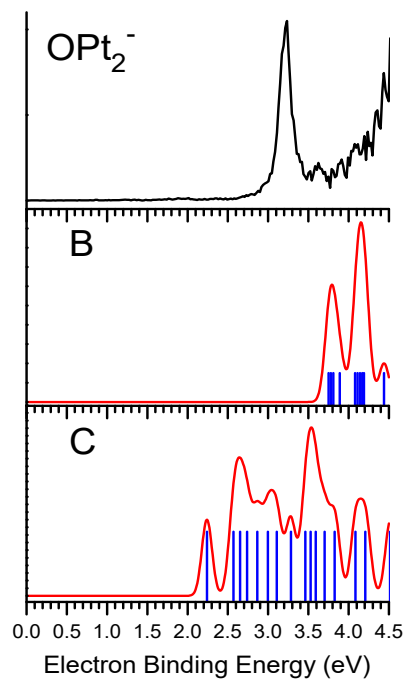

**Figure S1.** Theoretical simulated 266nm spectra of the low-lying isomers based on the generalized Koopmans' theorem. The blue vertical lines are the theoretical simulated spectral lines, which are correlated with the singly occupied molecular orbital (SOMO) and its lower molecular orbitals of GM. All peaks in the simulated spectra are broadened with unit-area Gaussian functions of 0.15 eV full width at half maximum by shifted to align with the ones at the PBE0 level.

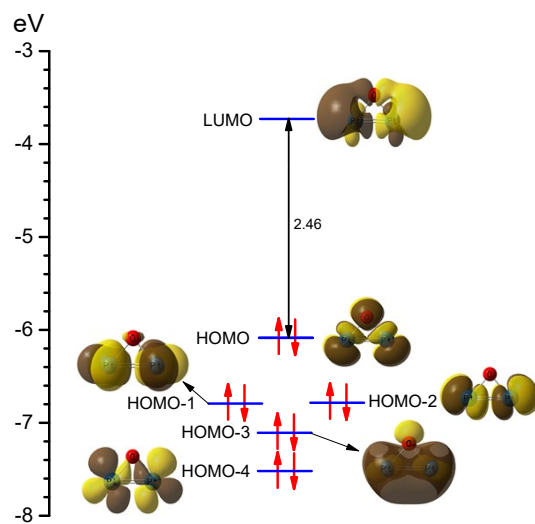

**Figure S2.** Molecular orbitals of neutral OPT<sub>2</sub> (isosurface value = 0.015).
